# Supplementary material for: What Can One Minute of the Day Tell about Physical Activity?
Source: MDPI journal article supplement (doi:10.3390/ijerph20196852), 2023-09-28
Supplement: s1 [file s1]

**Table S1.** Mean (SD, range) values are presented for body mass index (BMI) and age across cardiorespiratory fitness (CRF) deciles for both men and women. The CRF groups are labelled from 0 for the lowest CRF group to 9 for the highest CRF group and the group specific range of the maximum oxygen uptake (VO<sub>2</sub>max) is shown in the brackets.

| CRF group (VO <sub>2</sub> max range in ml/kg/min) |               | BMI (kg/m <sup>2</sup> )                 | Age (years)                           |
|----------------------------------------------------|---------------|------------------------------------------|---------------------------------------|
| Men                                                |               |                                          |                                       |
|                                                    | 0 (11.2–28.4) | 31.8 (5.5, 21.0–48.7) <sup>1–9</sup>     | 58.4 (11.5, 22–70) <sup>2–9</sup>     |
|                                                    | 1 (28.4–31.2) | 28.6 (3.5, 21.3–41.4) <sup>0,3–9</sup>   | 54.9 (1.02, 27–70) <sup>3–9</sup>     |
|                                                    | 2 (31.2–33.7) | 27.7 (3.3, 20.6–38.9) <sup>0,4–9</sup>   | 52.7 (12.6, 20–70) <sup>0,4–9</sup>   |
|                                                    | 3 (33.7–35.7) | 27.3 (3.3, 19.0–35.8) <sup>0,1,7–9</sup> | 49.0 (12.4, 24–69) <sup>0,1,5–9</sup> |
|                                                    | 4 (35.7–37.5) | 26.3 (3.1, 14.9–33.7) <sup>0–2,8,9</sup> | 47.9 (11.9, 26–69) <sup>0–2,5–9</sup> |
|                                                    | 5 (37.5–39.0) | 26.0 (3.2, 18.8–33.7) <sup>0–2,8,9</sup> | 41.8 (13.1, 20–69) <sup>0–3,7–9</sup> |
|                                                    | 6 (39.0–40.9) | 25.7 (2.7, 18.0–32.9) <sup>0–2,8,9</sup> | 41.4 (10.8, 21–69) <sup>0–4,9</sup>   |
|                                                    | 7 (40.9–42.6) | 25.3 (2.7, 18.9–33.3) <sup>0–3,9</sup>   | 36.2 (11.1, 20–69) <sup>0–5,9</sup>   |
|                                                    | 8 (42.6–45.3) | 24.6 (2.7, 16.7–32.0) <sup>0–6</sup>     | 36.8 (10.0, 21–65) <sup>0–5,9</sup>   |
|                                                    | 9 (45.3–53.4) | 23.1 (2.4, 18.1–30.7) <sup>0–7</sup>     | 29.8 (8.1, 20–56) <sup>0–8</sup>      |
| Women                                              |               |                                          |                                       |
|                                                    | 0 (9.9–24.6)  | 33.7 (4.3, 22.3–47.3) <sup>1–9</sup>     | 54.7 (11.8, 27–70) <sup>3–9</sup>     |
|                                                    | 1 (24.6–27.9) | 29.5 (3.5, 20.8–43.9) <sup>0,2–9</sup>   | 53.6 (11.5, 24–70) <sup>4–9</sup>     |
|                                                    | 2 (27.9–30.3) | 27.5 (3.0, 19.2–35.3) <sup>0,1,3–9</sup> | 51.4 (12.8, 20–69) <sup>4–9</sup>     |
|                                                    | 3 (30.3–32.3) | 26.1 (2.7, 19.6–39.6) <sup>0–2,5–9</sup> | 48.9 (13.4, 20–69) <sup>0,5–9</sup>   |
|                                                    | 4 (32.3–33.8) | 25.1 (2.5, 18.3–32.9) <sup>0–2,6–9</sup> | 45.8 (13.4, 20–69) <sup>0–2,7–9</sup> |
|                                                    | 5 (33.8–35.1) | 24.1 (2.5, 17.3–31.5) <sup>0–3,7–9</sup> | 44.5 (13.5, 20–69) <sup>0–3,7–9</sup> |
|                                                    | 6 (35.1–36.7) | 23.4 (2.2, 18.4–32.3) <sup>0–4,8,9</sup> | 41.6 (13.8, 20–69) <sup>0–3,8,9</sup> |
|                                                    | 7 (36.7–38.4) | 22.8 (2.1, 17.4–30.0) <sup>0–5,9</sup>   | 38.5 (11.9, 20–69) <sup>0–5,9</sup>   |
|                                                    | 8 (38.4–40.3) | 22.2 (2.0, 17.7–32.5) <sup>0–6,9</sup>   | 35.6 (11.3, 20–68) <sup>0–6</sup>     |
|                                                    | 9 (40.4–48.6) | 20.7 (1.8, 16.5–26.9) <sup>0–8</sup>     | 33.2 (9.9, 20–69) <sup>0–7</sup>      |

The superscripted number indicates a statistically significant difference ( $p < 0.05$ ) from the specified CRF decile group. An independent-samples Kruskal-Wallis's test with a Bonferroni post-hoc test was used to compare the differences between the CRF groups.

**Table S2.** Mean (SD) values are presented for the number of hours containing activity and peak intensities across cardiorespiratory fitness (CRF) deciles for both men and women. The CRF deciles are labelled from 0 for the lowest CRF group to 9 for the highest CRF group.

| CRF decile   | Daily peak intensity in metabolic equivalents (MET), oxygen uptake reserve (VO <sub>2</sub> R) and the mean individual coefficient of variation (CV) |                                |                                | The number of hours containing at least one physical activity bout which intensity was over the threshold below in metabolic equivalents (MET) |                                |                                | The number of hours containing at least one physical activity bout which intensity was over the threshold below in oxygen uptake reserve (VO <sub>2</sub> R) |                                |                              |
|--------------|------------------------------------------------------------------------------------------------------------------------------------------------------|--------------------------------|--------------------------------|------------------------------------------------------------------------------------------------------------------------------------------------|--------------------------------|--------------------------------|--------------------------------------------------------------------------------------------------------------------------------------------------------------|--------------------------------|------------------------------|
|              | peak MET                                                                                                                                             | peak VO <sub>2</sub> R         | CV                             | 3 MET                                                                                                                                          | 6 MET                          | 8.8 MET                        | 40 % VO <sub>2</sub> R                                                                                                                                       | 60 % VO <sub>2</sub> R         | 90 % VO <sub>2</sub> R       |
| <b>Men</b>   |                                                                                                                                                      |                                |                                |                                                                                                                                                |                                |                                |                                                                                                                                                              |                                |                              |
| 0            | 4.7 (0.8) <sup>1-9</sup>                                                                                                                             | 65 % (18 %) <sup>1-9</sup>     | 13 % (10 %) <sup>3-9</sup>     | 7.3 (2.8) <sup>1-9</sup>                                                                                                                       | 0.10 (0.31) <sup>2-9</sup>     | 0.02 (0.09) <sup>2-9</sup>     | 5.4 (2.9) <sup>1-9</sup>                                                                                                                                     | 1.46 (1.85) <sup>1-9</sup>     | 0.22 (0.75)                  |
| 1            | 5.1 (0.7) <sup>0,3-9</sup>                                                                                                                           | 54 % (9 %) <sup>0,4-8,9</sup>  | 13 % (10 %) <sup>3-9</sup>     | 8.4 (2.6) <sup>0,5-9</sup>                                                                                                                     | 0.17 (0.38) <sup>3-9</sup>     | 0.02 (0.12) <sup>3-9</sup>     | 3.3 (1.8) <sup>0,3-9</sup>                                                                                                                                   | 0.34 (0.51) <sup>0</sup>       | 0.04 (0.18) <sup>6-8</sup>   |
| 2            | 5.3 (0.8) <sup>0,5-9</sup>                                                                                                                           | 51 % (10 %) <sup>0,9</sup>     | 17 % (14 %) <sup>6-9</sup>     | 8.8 (2.6) <sup>0,6-9</sup>                                                                                                                     | 0.22 (0.33) <sup>0,3-9</sup>   | 0.04 (0.09) <sup>0,3-9</sup>   | 2.7 (1.7) <sup>0,4-9</sup>                                                                                                                                   | 0.24 (0.32) <sup>0</sup>       | 0.04 (0.10) <sup>6-8</sup>   |
| 3            | 5.7 (1.1) <sup>0,1,6-9</sup>                                                                                                                         | 52 % (13 %) <sup>0</sup>       | 18 % (12 %) <sup>0,1,7,9</sup> | 9.0 (2.4) <sup>0,6-8</sup>                                                                                                                     | 0.40 (0.51) <sup>0-2,6-9</sup> | 0.10 (0.25) <sup>0-2,6-9</sup> | 2.3 (1.3) <sup>0,1,6-9</sup>                                                                                                                                 | 0.27 (0.40) <sup>0</sup>       | 0.10 (0.23) <sup>7</sup>     |
| 4            | 5.6 (1.1) <sup>0,1,6-9</sup>                                                                                                                         | 49 % (12 %) <sup>0,1</sup>     | 17 % (12 %) <sup>0,1,6-9</sup> | 8.8 (2.6) <sup>0,6-9</sup>                                                                                                                     | 0.36 (0.53) <sup>0,1,6-9</sup> | 0.09 (0.22) <sup>0,1,6-9</sup> | 1.8 (1.3) <sup>0-2,9</sup>                                                                                                                                   | 0.20 (0.33) <sup>0,6-8</sup>   | 0.07 (0.18)                  |
| 5            | 5.9 (1.2) <sup>0-2,7-9</sup>                                                                                                                         | 50 % (12 %) <sup>0,1</sup>     | 19 % (13 %) <sup>0,1,9</sup>   | 9.2 (2.3) <sup>0,1</sup>                                                                                                                       | 0.49 (0.61) <sup>0-2,7-9</sup> | 0.16 (0.28) <sup>0-2,7-9</sup> | 1.8 (1.3) <sup>0-2,9</sup>                                                                                                                                   | 0.25 (0.35) <sup>0</sup>       | 0.10 (0.23)                  |
| 6            | 6.2 (1.3) <sup>0-4,9</sup>                                                                                                                           | 50 % (12 %) <sup>0,1</sup>     | 24 % (15 %) <sup>0-2,4</sup>   | 10.0 (2.5) <sup>0-4</sup>                                                                                                                      | 0.61 (0.6) <sup>0-4,9</sup>    | 0.20 (0.31) <sup>0-4,9</sup>   | 1.6 (1.2) <sup>0-3,9</sup>                                                                                                                                   | 0.33 (0.41) <sup>0,4</sup>     | 0.11 (0.23) <sup>1,2</sup>   |
| 7            | 6.7 (1.6) <sup>0-5</sup>                                                                                                                             | 52 % (15 %) <sup>0</sup>       | 24 % (14 %) <sup>0-4</sup>     | 10.0 (2.3) <sup>0-4</sup>                                                                                                                      | 0.83 (0.81) <sup>0-5</sup>     | 0.32 (0.44) <sup>0-5</sup>     | 1.5 (1.2) <sup>0-3</sup>                                                                                                                                     | 0.39 (0.46) <sup>0,4</sup>     | 0.13 (0.27) <sup>1-3</sup>   |
| 8            | 6.8 (1.8) <sup>0-5</sup>                                                                                                                             | 51 % (16 %) <sup>0,1</sup>     | 22 % (12 %) <sup>0-2,4</sup>   | 10.0 (2.4) <sup>0-4</sup>                                                                                                                      | 0.89 (0.89) <sup>0-5</sup>     | 0.32 (0.49) <sup>0-5</sup>     | 1.3 (1.1) <sup>0-3</sup>                                                                                                                                     | 0.40 (0.55) <sup>0,4</sup>     | 0.15 (0.36) <sup>1,2</sup>   |
| 9            | 7.0 (1.8) <sup>0-6</sup>                                                                                                                             | 48 % (14 %) <sup>0-2</sup>     | 24 % (13 %) <sup>0-5</sup>     | 9.8 (2.4) <sup>0-2,4</sup>                                                                                                                     | 1.08 (1.00) <sup>0-6</sup>     | 0.37 (0.61) <sup>0-6</sup>     | 1.0 (0.9) <sup>0-6</sup>                                                                                                                                     | 0.38 (0.63) <sup>0</sup>       | 0.11 (0.26)                  |
| <b>Women</b> |                                                                                                                                                      |                                |                                |                                                                                                                                                |                                |                                |                                                                                                                                                              |                                |                              |
| 0            | 4.8 (0.8) <sup>2-9</sup>                                                                                                                             | 76 % (20 %) <sup>1-9</sup>     | 13 % (10 %) <sup>3-9</sup>     | 6.8 (2.6) <sup>1-9</sup>                                                                                                                       | 0.13 (0.34) <sup>2-9</sup>     | 0.02 (0.08) <sup>3-9</sup>     | 6.8 (3.0) <sup>1-9</sup>                                                                                                                                     | 2.66 (2.09) <sup>1-9</sup>     | 0.41 (0.95) <sup>1-6</sup>   |
| 1            | 5.0 (0.7) <sup>3-9</sup>                                                                                                                             | 62 % (12 %) <sup>0,2-9</sup>   | 14 % (10 %) <sup>5-9</sup>     | 7.6 (2.6) <sup>0,4-9</sup>                                                                                                                     | 0.18 (0.37) <sup>3-9</sup>     | 0.02 (0.06) <sup>4-9</sup>     | 4.7 (2.2) <sup>0,2-9</sup>                                                                                                                                   | 1.13 (1.14) <sup>0,2-9</sup>   | 0.07 (0.14) <sup>0,8,9</sup> |
| 2            | 5.3 (0.9) <sup>0,3-9</sup>                                                                                                                           | 59 % (13 %) <sup>0,1,6,9</sup> | 15 % (10 %) <sup>5-9</sup>     | 7.7 (2.6) <sup>0,4-9</sup>                                                                                                                     | 0.26 (0.45) <sup>0,3-9</sup>   | 0.04 (0.11) <sup>5-9</sup>     | 3.5 (1.8) <sup>0,1,6-9</sup>                                                                                                                                 | 0.74 (0.89) <sup>0,1,4-7</sup> | 0.08 (0.18) <sup>0,8,9</sup> |
| 3            | 5.6 (1.0) <sup>0-2,5-9</sup>                                                                                                                         | 58 % (13 %) <sup>0,1</sup>     | 17 % (11 %) <sup>0,7-9</sup>   | 8.2 (2.4) <sup>0,6-9</sup>                                                                                                                     | 0.42 (0.61) <sup>0-2,5-9</sup> | 0.08 (0.23) <sup>0,7-9</sup>   | 3.3 (1.6) <sup>0,1,6-9</sup>                                                                                                                                 | 0.57 (0.71) <sup>0,1</sup>     | 0.11 (0.24) <sup>0</sup>     |
| 4            | 5.8 (1.1) <sup>0-2,7-9</sup>                                                                                                                         | 57 % (13 %) <sup>0,1</sup>     | 17 % (10 %) <sup>0,7-9</sup>   | 8.7 (2.4) <sup>0-2</sup>                                                                                                                       | 0.47 (0.59) <sup>0-2,7-9</sup> | 0.08 (0.20) <sup>0,1,7-9</sup> | 3.1 (1.6) <sup>0,1,7-9</sup>                                                                                                                                 | 0.43 (0.57) <sup>0-2</sup>     | 0.09 (0.22) <sup>0</sup>     |
| 5            | 6.0 (1.0) <sup>0-3,7-9</sup>                                                                                                                         | 56 % (12 %) <sup>0,1</sup>     | 18 % (11 %) <sup>0-2,8,9</sup> | 8.8 (2.5) <sup>0-2</sup>                                                                                                                       | 0.62 (0.67) <sup>0-3,8,9</sup> | 0.10 (0.20) <sup>0-2,7-9</sup> | 3.0 (1.7) <sup>0,1,8,9</sup>                                                                                                                                 | 0.42 (0.52) <sup>0-2</sup>     | 0.09 (0.18) <sup>0</sup>     |
| 6            | 6.0 (1.1) <sup>0-3,8,9</sup>                                                                                                                         | 54 % (12 %) <sup>0-2</sup>     | 19 % (11 %) <sup>0-2,8,9</sup> | 9.1 (2.4) <sup>0-3</sup>                                                                                                                       | 0.66 (0.70) <sup>0-3,8,9</sup> | 0.12 (0.25) <sup>0-2,7-9</sup> | 2.6 (1.6) <sup>0-3,9</sup>                                                                                                                                   | 0.35 (0.45) <sup>0-2</sup>     | 0.10 (0.23) <sup>0</sup>     |
| 7            | 6.5 (1.3) <sup>0-5,9</sup>                                                                                                                           | 56 % (14 %) <sup>0,1</sup>     | 22 % (11 %) <sup>0-4</sup>     | 9.2 (2.4) <sup>0-3</sup>                                                                                                                       | 0.82 (0.83) <sup>0-4,9</sup>   | 0.20 (0.35) <sup>0-6,9</sup>   | 2.5 (1.3) <sup>0-4</sup>                                                                                                                                     | 0.37 (0.46) <sup>0-2</sup>     | 0.14 (0.30)                  |
| 8            | 6.6 (1.5) <sup>0-6</sup>                                                                                                                             | 55 % (15 %) <sup>0,1</sup>     | 21 % (10 %) <sup>0-6</sup>     | 9.3 (2.1) <sup>0-3</sup>                                                                                                                       | 0.90 (0.79) <sup>0-6</sup>     | 0.24 (0.36) <sup>0-6</sup>     | 2.3 (1.3) <sup>0-5</sup>                                                                                                                                     | 0.40 (0.48) <sup>0,1</sup>     | 0.14 (0.27) <sup>1,2</sup>   |
| 9            | 7.0 (1.5) <sup>0-7</sup>                                                                                                                             | 54 % (12 %) <sup>0-2</sup>     | 24 % (11 %) <sup>0-6</sup>     | 9.4 (2.3) <sup>0-3</sup>                                                                                                                       | 1.17 (1.05) <sup>0-7</sup>     | 0.31 (0.41) <sup>0-7</sup>     | 2.0 (1.4) <sup>0-6</sup>                                                                                                                                     | 0.44 (0.47) <sup>0,1</sup>     | 0.13 (0.26) <sup>1,2</sup>   |

The superscripted number indicates a statistically significant difference ( $p < 0.05$ ) from the specified CRF decile group. An independent-samples Kruskal-Wallis's test with a Bonferroni post-hoc test was used to compare the differences between the CRF groups.
